# Supplementary material for: The Effect of Bimanual Intensive Functional Training on Somatosensory Hand Function in Children with Unilateral Spastic Cerebral Palsy: An Observational Study
Source: J Clin Med. 2023 Feb 17;12(4):1595. doi: 10.3390/jcm12041595 (PMC9960591; doi:10.3390/jcm12041595)
Supplement: Supplementary file 1 [file jcm-12-01595-s001.zip › Supplementary file S2 GAS 230112.pdf]

**Supplementary information to our paper, titled: “The effect of bimanual intensive functional training on somatosensory hand function in children with unilateral spastic cerebral palsy”.**

**S2** A list of the individual treatment goals for all participants:

| <b>Participant</b> | <b>Most important bimanual treatment goal (GAS score 0)</b>                                                                                                              |
|--------------------|--------------------------------------------------------------------------------------------------------------------------------------------------------------------------|
| <b>1</b>           | Participant is able to put a chair upside down on a table within one minute and ten seconds                                                                              |
| <b>2</b>           | Participant is able to wrap a can of shaving cream within one minute and thirty seconds                                                                                  |
| <b>3</b>           | Participant is able to peel an onion and cut it into equally sized cubes within two minutes and thirty seconds                                                           |
| <b>4</b>           | Participant is able to chop a quarter of a bell pepper with a knife in one minute                                                                                        |
| <b>5</b>           | Participant can cut a piece of raw chicken meat in half with a knife and fork with the fork slipping away only one time                                                  |
| <b>6</b>           | Participant closes a zipper of a cardigan within twenty-eight seconds                                                                                                    |
| <b>7</b>           | Participant can stack up four chairs on a stack of four chairs within one minute and ten seconds                                                                         |
| <b>8</b>           | Participant cuts half of a bell pepper with a knife in fifteen pieces within two minutes and fourteen seconds                                                            |
| <b>9</b>           | Participant is able to put a watch strap in the buckle of the watch, and strap the watch within fifty-six seconds                                                        |
| <b>10</b>          | Participant is able to tie her own hair into a simple pony tail by grasping the hair with the left hand and fixing the pony tail using a hair tie with the right hand    |
| <b>11</b>          | Participant is able to tie his shoes into a loose knot in five steps                                                                                                     |
| <b>12</b>          | Participant is able to dry a cup by holding a dish cloth in the left hand and the cup in the right hand, within two minutes                                              |
| <b>13</b>          | Participant is able to peel one side a medium-sized potato using a vegetable peeler in one minute and fifteen seconds, by fixing the potato with a fork in the left hand |
| <b>14</b>          | Participant is able to cut a raw piece of meat in nine slices in one minute and thirty seconds                                                                           |
| <b>15</b>          | Participant is able to cut half a carrot into 5mm slices in one minute                                                                                                   |
| <b>16</b>          | Participant is able to peel one side of a medium-sized potato using a vegetable peeler in one minute, with the potato slipping away maximum two times                    |
| <b>17</b>          | Participant is able to transport garbage on a surface of 4x2 square metre without dropping any garbage in three minutes                                                  |

|           |                                                                                                                                                        |
|-----------|--------------------------------------------------------------------------------------------------------------------------------------------------------|
| <b>18</b> | Participant is able to type ninety characters on a computer keyboard in one minute by using both hands                                                 |
| <b>19</b> | Participant is able to tie her own hair into a simple pony tail by wrapping the hair tie around the ponytail two times                                 |
| <b>20</b> | Participant is able to tie her own hair into a tight ponytail by wrapping the hair tie around the ponytail three times                                 |
| <b>21</b> | Participant is able to type sixty characters on a computer keyboard in one minute and ten seconds by using two fingers of the left hand                |
| <b>22</b> | Participant is able to peel a pear by using a vegetable peeler in one minute                                                                           |
| <b>23</b> | Participant is able to peel a medium-sized potato using a vegetable peeler in one minute and thirty seconds                                            |
| <b>24</b> | Participant is able to peel the plastic packaging off one-third of a sausage and cut this piece into small pieces within one minute and thirty seconds |
